# Supplementary material for: Alpha B-Crystallin in Muscle Disease Prevention: The Role of Physical Activity
Source: MDPI journal article supplement (doi:10.3390/molecules27031147), 2022-02-08
Supplement: s1 [file s1]

## Supplementary Materials

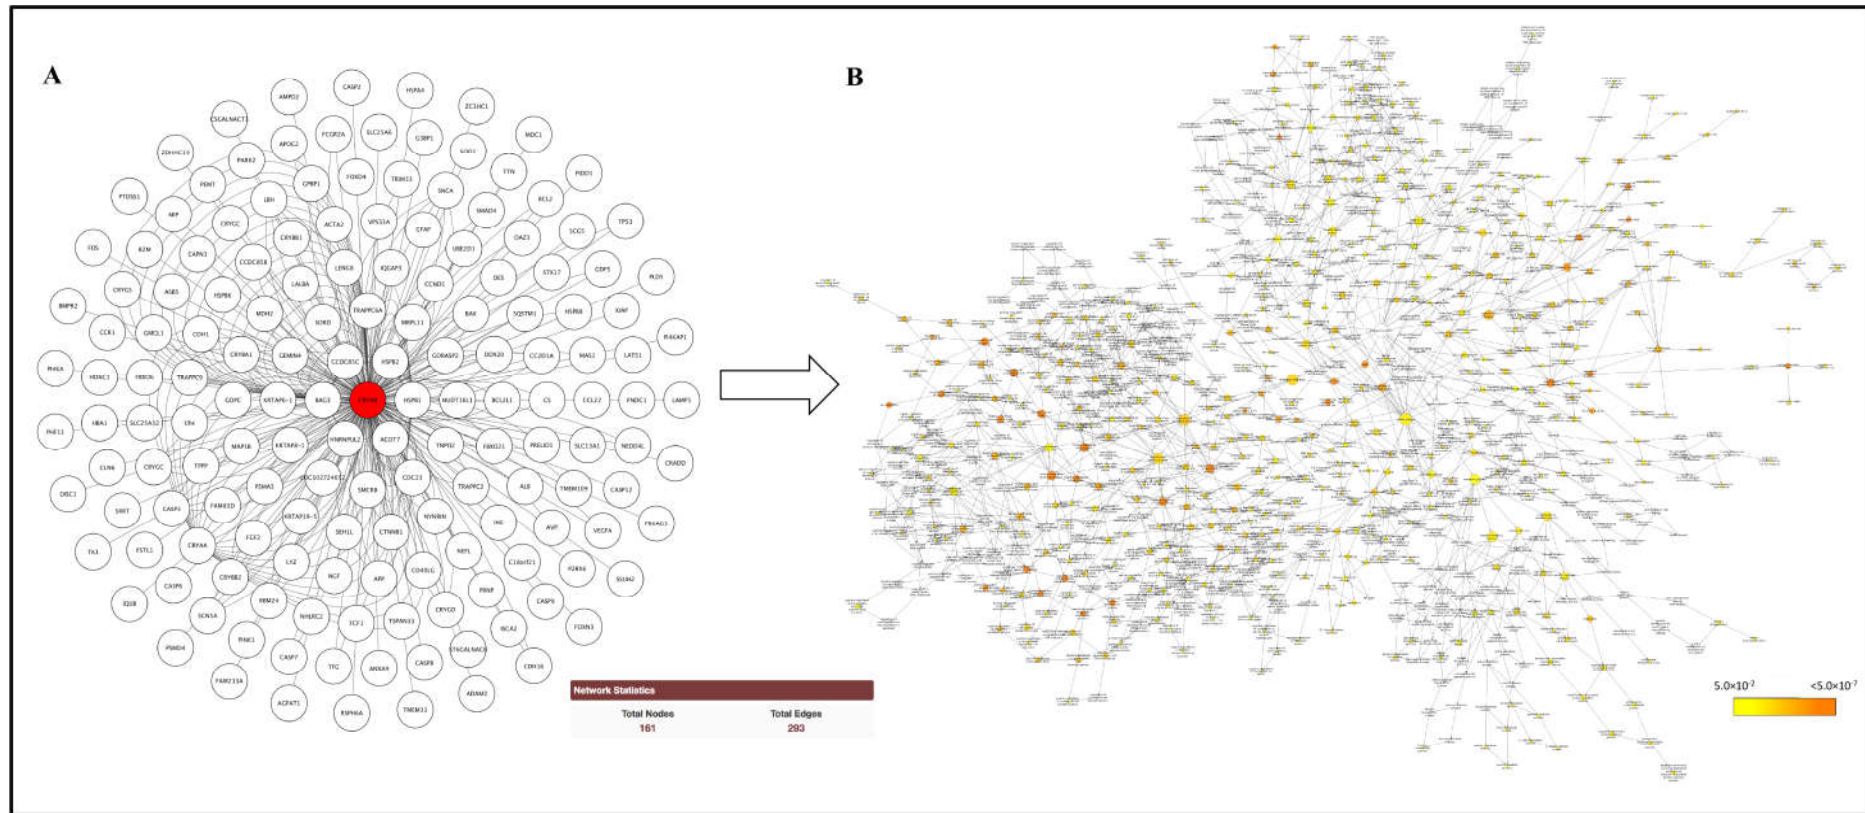

**Figure S1.** Schematic representation of (A) HSPB5 physical interaction with numerous targets and (B) the predominant biological functions resulting from the gene set network. All details are given in Supplementary Table S1. General Repository for Interaction Datasets (BioGRID), followed by BiNGO, a plug-in of Cytoscape 3.8.2 software were used for the Gene Ontology analysis ( $p < 0.05$ , all biological processes are visualized).

**Table S1.** Enriched biological functions related to HSPB5 network.

| GO ID | GO Description                                            | Corrected <i>p</i> -Value |
|-------|-----------------------------------------------------------|---------------------------|
| 10941 | regulation of cell death                                  | 1.3106E-13                |
| 43067 | regulation of programmed cell death                       | 3.3024E-13                |
| 42981 | regulation of apoptosis                                   | 1.0456E-12                |
| 60548 | negative regulation of cell death                         | 1.3226E-12                |
| 43066 | negative regulation of apoptosis                          | 3.1712E-10                |
| 10035 | response to inorganic substance                           | 3.1712E-10                |
| 43069 | negative regulation of programmed cell death              | 3.1712E-10                |
| 9628  | response to abiotic stimulus                              | 9.3241E-10                |
| 6916  | anti-apoptosis                                            | 1.2442E-9                 |
| 9266  | response to temperature stimulus                          | 1.5475E-9                 |
| 48522 | positive regulation of cellular process                   | 1.0653E-8                 |
| 9408  | response to heat                                          | 7.2713E-8                 |
| 48518 | positive regulation of biological process                 | 8.0915E-8                 |
| 2088  | lens development in camera-type eye                       | 1.2106E-7                 |
| 31399 | regulation of protein modification process                | 2.1695E-7                 |
| 48523 | negative regulation of cellular process                   | 2.4370E-7                 |
| 32270 | positive regulation of cellular protein metabolic process | 2.4370E-7                 |
| 10038 | response to metal ion                                     | 2.4774E-7                 |
| 32268 | regulation of cellular protein metabolic process          | 2.5105E-7                 |
| 42221 | response to chemical stimulus                             | 3.9729E-7                 |
| 51247 | positive regulation of protein metabolic process          | 4.5582E-7                 |
| 31401 | positive regulation of protein modification process       | 4.5582E-7                 |
| 51246 | regulation of protein metabolic process                   | 4.7231E-7                 |
| 8219  | cell death                                                | 6.0996E-7                 |
| 90066 | regulation of anatomical structure size                   | 6.3460E-7                 |
| 16265 | death                                                     | 6.4982E-7                 |
| 48519 | negative regulation of biological process                 | 7.7189E-7                 |
| 43010 | camera-type eye development                               | 1.2266E-6                 |
| 6950  | response to stress                                        | 1.4899E-6                 |
| 1836  | release of cytochrome c from mitochondria                 | 2.3185E-6                 |
| 32535 | regulation of cellular component size                     | 4.9176E-6                 |
| 42493 | response to drug                                          | 9.1544E-6                 |
| 1654  | eye development                                           | 9.3503E-6                 |
| 8361  | regulation of cell size                                   | 9.6696E-6                 |
| 65008 | regulation of biological quality                          | 9.9022E-6                 |
| 43523 | regulation of neuron apoptosis                            | 1.1505E-5                 |
| 8637  | apoptotic mitochondrial changes                           | 1.5474E-5                 |
| 46668 | regulation of retinal cell programmed cell death          | 1.5792E-5                 |
| 51049 | regulation of transport                                   | 1.7983E-5                 |
| 9892  | negative regulation of metabolic process                  | 2.3064E-5                 |
| 7005  | mitochondrion organization                                | 2.3841E-5                 |
| 10033 | response to organic substance                             | 2.4464E-5                 |
| 51239 | regulation of multicellular organismal process            | 2.7010E-5                 |
| 7423  | sensory organ development                                 | 2.8008E-5                 |
| 10604 | positive regulation of macromolecule metabolic process    | 2.8008E-5                 |

|       |                                                           |           |
|-------|-----------------------------------------------------------|-----------|
| 9893  | positive regulation of metabolic process                  | 3.5530E-5 |
| 1558  | regulation of cell growth                                 | 3.6071E-5 |
| 50896 | response to stimulus                                      | 3.9011E-5 |
| 43065 | positive regulation of apoptosis                          | 3.9011E-5 |
| 9314  | response to radiation                                     | 4.0362E-5 |
| 31325 | positive regulation of cellular metabolic process         | 4.0362E-5 |
| 43068 | positive regulation of programmed cell death              | 4.0362E-5 |
| 9607  | response to biotic stimulus                               | 4.0846E-5 |
| 60341 | regulation of cellular localization                       | 4.3170E-5 |
| 10942 | positive regulation of cell death                         | 4.3170E-5 |
| 40008 | regulation of growth                                      | 5.6766E-5 |
| 6915  | apoptosis                                                 | 5.6766E-5 |
| 302   | response to reactive oxygen species                       | 5.6766E-5 |
| 10605 | negative regulation of macromolecule metabolic process    | 5.7230E-5 |
| 51789 | response to protein stimulus                              | 5.9250E-5 |
| 51259 | protein oligomerization                                   | 6.6096E-5 |
| 12501 | programmed cell death                                     | 6.8345E-5 |
| 1934  | positive regulation of protein amino acid phosphorylation | 6.9774E-5 |
| 51881 | regulation of mitochondrial membrane potential            | 8.4773E-5 |
| 43281 | regulation of caspase activity                            | 8.4773E-5 |
| 52548 | regulation of endopeptidase activity                      | 1.3401E-4 |
| 32879 | regulation of localization                                | 1.3401E-4 |
| 42327 | positive regulation of phosphorylation                    | 1.3401E-4 |
| 6508  | proteolysis                                               | 1.4239E-4 |
| 45937 | positive regulation of phosphate metabolic process        | 1.5387E-4 |
| 10562 | positive regulation of phosphorus metabolic process       | 1.5387E-4 |
| 51094 | positive regulation of developmental process              | 1.5387E-4 |
| 33554 | cellular response to stress                               | 1.6177E-4 |
| 52547 | regulation of peptidase activity                          | 1.7449E-4 |
| 1932  | regulation of protein amino acid phosphorylation          | 1.9430E-4 |
| 7006  | mitochondrial membrane organization                       | 2.0786E-4 |
| 30307 | positive regulation of cell growth                        | 2.0909E-4 |
| 10039 | response to iron ion                                      | 2.0909E-4 |
| 34097 | response to cytokine stimulus                             | 2.1716E-4 |
| 10646 | regulation of cell communication                          | 2.2072E-4 |
| 51130 | positive regulation of cellular component organization    | 2.2347E-4 |
| 6917  | induction of apoptosis                                    | 2.3339E-4 |
| 22402 | cell cycle process                                        | 2.3339E-4 |
| 9416  | response to light stimulus                                | 2.3547E-4 |
| 12502 | induction of programmed cell death                        | 2.3576E-4 |
| 6979  | response to oxidative stress                              | 2.4764E-4 |
| 43524 | negative regulation of neuron apoptosis                   | 2.6452E-4 |
| 51128 | regulation of cellular component organization             | 3.0405E-4 |
| 45793 | positive regulation of cell size                          | 3.2010E-4 |
| 51704 | multi-organism process                                    | 3.2010E-4 |
| 43933 | macromolecular complex subunit organization               | 3.3609E-4 |
| 278   | mitotic cell cycle                                        | 3.3609E-4 |
| 50789 | regulation of biological process                          | 3.3609E-4 |

|       |                                                         |           |
|-------|---------------------------------------------------------|-----------|
| 51716 | cellular response to stimulus                           | 3.4538E-4 |
| 45595 | regulation of cell differentiation                      | 4.0199E-4 |
| 77    | DNA damage checkpoint                                   | 4.4934E-4 |
| 3008  | system process                                          | 4.5090E-4 |
| 51726 | regulation of cell cycle                                | 4.5180E-4 |
| 51412 | response to corticosterone stimulus                     | 4.8546E-4 |
| 51051 | negative regulation of transport                        | 4.8546E-4 |
| 70271 | protein complex biogenesis                              | 4.9255E-4 |
| 6461  | protein complex assembly                                | 4.9255E-4 |
| 60284 | regulation of cell development                          | 5.3505E-4 |
| 9411  | response to UV                                          | 5.5304E-4 |
| 43086 | negative regulation of catalytic activity               | 5.6912E-4 |
| 31570 | DNA integrity checkpoint                                | 5.9515E-4 |
| 45597 | positive regulation of cell differentiation             | 6.1827E-4 |
| 51248 | negative regulation of protein metabolic process        | 6.7369E-4 |
| 9636  | response to toxin                                       | 6.8659E-4 |
| 42542 | response to hydrogen peroxide                           | 6.8659E-4 |
| 10647 | positive regulation of cell communication               | 7.0631E-4 |
| 50790 | regulation of catalytic activity                        | 7.2451E-4 |
| 22607 | cellular component assembly                             | 8.0667E-4 |
| 65007 | biological regulation                                   | 8.9663E-4 |
| 8635  | activation of caspase activity by cytochrome c          | 8.9663E-4 |
| 31400 | negative regulation of protein modification process     | 8.9663E-4 |
| 50793 | regulation of developmental process                     | 9.3990E-4 |
| 51385 | response to mineralocorticoid stimulus                  | 9.5287E-4 |
| 44092 | negative regulation of molecular function               | 9.8814E-4 |
| 48545 | response to steroid hormone stimulus                    | 9.9975E-4 |
| 30308 | negative regulation of cell growth                      | 9.9975E-4 |
| 7626  | locomotory behavior                                     | 1.0103E-3 |
| 35466 | regulation of signaling pathway                         | 1.0379E-3 |
| 51260 | protein homooligomerization                             | 1.0379E-3 |
| 50794 | regulation of cellular process                          | 1.0414E-3 |
| 51240 | positive regulation of multicellular organismal process | 1.0773E-3 |
| 9605  | response to external stimulus                           | 1.0773E-3 |
| 35468 | positive regulation of signaling pathway                | 1.0809E-3 |
| 9719  | response to endogenous stimulus                         | 1.0869E-3 |
| 65003 | macromolecular complex assembly                         | 1.0889E-3 |
| 46902 | regulation of mitochondrial membrane permeability       | 1.1765E-3 |
| 226   | microtubule cytoskeleton organization                   | 1.1792E-3 |
| 44265 | cellular macromolecule catabolic process                | 1.1920E-3 |
| 6996  | organelle organization                                  | 1.1920E-3 |
| 8624  | induction of apoptosis by extracellular signals         | 1.2131E-3 |
| 45471 | response to ethanol                                     | 1.3433E-3 |
| 45792 | negative regulation of cell size                        | 1.3433E-3 |
| 7010  | cytoskeleton organization                               | 1.3676E-3 |
| 30163 | protein catabolic process                               | 1.4035E-3 |
| 10243 | response to organic nitrogen                            | 1.4126E-3 |
| 44085 | cellular component biogenesis                           | 1.4282E-3 |

|       |                                                                                                |           |
|-------|------------------------------------------------------------------------------------------------|-----------|
| 30264 | nuclear fragmentation involved in apoptotic nuclear change                                     | 1.4282E-3 |
| 46670 | positive regulation of retinal cell programmed cell death                                      | 1.4282E-3 |
| 71763 | nuclear membrane organization                                                                  | 1.4282E-3 |
| 60732 | positive regulation of inositol phosphate biosynthetic process                                 | 1.4282E-3 |
| 43627 | response to estrogen stimulus                                                                  | 1.5801E-3 |
| 42325 | regulation of phosphorylation                                                                  | 1.6492E-3 |
| 8284  | positive regulation of cell proliferation                                                      | 1.6492E-3 |
| 32269 | negative regulation of cellular protein metabolic process                                      | 1.7003E-3 |
| 48678 | response to axon injury                                                                        | 1.7342E-3 |
| 7017  | microtubule-based process                                                                      | 1.7374E-3 |
| 35239 | tube morphogenesis                                                                             | 1.7986E-3 |
| 7610  | behavior                                                                                       | 1.8708E-3 |
| 22603 | regulation of anatomical structure morphogenesis                                               | 1.9134E-3 |
| 65009 | regulation of molecular function                                                               | 1.9385E-3 |
| 51707 | response to other organism                                                                     | 1.9846E-3 |
| 10720 | positive regulation of cell development                                                        | 2.0471E-3 |
| 45927 | positive regulation of growth                                                                  | 2.1720E-3 |
| 7049  | cell cycle                                                                                     | 2.2484E-3 |
| 9611  | response to wounding                                                                           | 2.4096E-3 |
| 51603 | proteolysis involved in cellular protein catabolic process                                     | 2.4327E-3 |
| 31103 | axon regeneration                                                                              | 2.4327E-3 |
| 32387 | negative regulation of intracellular transport                                                 | 2.4327E-3 |
| 51174 | regulation of phosphorus metabolic process                                                     | 2.4327E-3 |
| 19220 | regulation of phosphate metabolic process                                                      | 2.4327E-3 |
| 44057 | regulation of system process                                                                   | 2.4993E-3 |
| 44257 | cellular protein catabolic process                                                             | 2.5543E-3 |
| 45926 | negative regulation of growth                                                                  | 2.5677E-3 |
| 9991  | response to extracellular stimulus                                                             | 2.6650E-3 |
| 6997  | nucleus organization                                                                           | 2.6650E-3 |
| 43085 | positive regulation of catalytic activity                                                      | 2.9188E-3 |
| 32880 | regulation of protein localization                                                             | 2.9642E-3 |
| 19217 | regulation of fatty acid metabolic process                                                     | 3.0738E-3 |
| 16043 | cellular component organization                                                                | 3.1605E-3 |
| 42770 | DNA damage response, signal transduction                                                       | 3.2152E-3 |
| 9725  | response to hormone stimulus                                                                   | 3.4533E-3 |
| 90199 | regulation of release of cytochrome c from mitochondria                                        | 3.4688E-3 |
| 10919 | regulation of inositol phosphate biosynthetic process                                          | 3.4688E-3 |
| 9057  | macromolecule catabolic process                                                                | 3.5246E-3 |
| 31102 | neuron projection regeneration                                                                 | 3.5851E-3 |
| 51436 | negative regulation of ubiquitin-protein ligase activity involved in mitotic cell cycle        | 3.7131E-3 |
| 32386 | regulation of intracellular transport                                                          | 3.8874E-3 |
| 31145 | anaphase-promoting complex-dependent proteasomal ubiquitin-dependent protein catabolic process | 3.9594E-3 |
| 23056 | positive regulation of signaling process                                                       | 4.0498E-3 |
| 51437 | positive regulation of ubiquitin-protein ligase activity involved in mitotic cell cycle        | 4.2169E-3 |
| 44248 | cellular catabolic process                                                                     | 4.2492E-3 |

|       |                                                                                |           |
|-------|--------------------------------------------------------------------------------|-----------|
| 32502 | developmental process                                                          | 4.2492E-3 |
| 9653  | anatomical structure morphogenesis                                             | 4.7128E-3 |
| 51352 | negative regulation of ligase activity                                         | 4.7165E-3 |
| 51444 | negative regulation of ubiquitin-protein ligase activity                       | 4.7165E-3 |
| 6986  | response to unfolded protein                                                   | 4.7165E-3 |
| 819   | sister chromatid segregation                                                   | 4.7421E-3 |
| 31324 | negative regulation of cellular metabolic process                              | 4.7762E-3 |
| 51329 | interphase of mitotic cell cycle                                               | 4.7837E-3 |
| 46686 | response to cadmium ion                                                        | 4.9962E-3 |
| 51402 | neuron apoptosis                                                               | 4.9962E-3 |
| 9056  | catabolic process                                                              | 5.1147E-3 |
| 51223 | regulation of protein transport                                                | 5.1147E-3 |
| 43170 | macromolecule metabolic process                                                | 5.1147E-3 |
| 51046 | regulation of secretion                                                        | 5.1147E-3 |
| 51439 | regulation of ubiquitin-protein ligase activity involved in mitotic cell cycle | 5.1501E-3 |
| 48878 | chemical homeostasis                                                           | 5.1909E-3 |
| 33043 | regulation of organelle organization                                           | 5.3521E-3 |
| 31667 | response to nutrient levels                                                    | 5.4875E-3 |
| 51325 | interphase                                                                     | 5.5629E-3 |
| 35295 | tube development                                                               | 5.5967E-3 |
| 46688 | response to copper ion                                                         | 5.6787E-3 |
| 51443 | positive regulation of ubiquitin-protein ligase activity                       | 5.6787E-3 |
| 48856 | anatomical structure development                                               | 5.6787E-3 |
| 75    | cell cycle checkpoint                                                          | 5.6836E-3 |
| 14070 | response to organic cyclic substance                                           | 5.6836E-3 |
| 70141 | response to UV-A                                                               | 5.7084E-3 |
| 14012 | axon regeneration in the peripheral nervous system                             | 5.7084E-3 |
| 43497 | regulation of protein heterodimerization activity                              | 5.7084E-3 |
| 60561 | apoptosis involved in morphogenesis                                            | 5.7084E-3 |
| 7178  | transmembrane receptor protein serine/threonine kinase signaling pathway       | 5.8328E-3 |
| 43623 | cellular protein complex assembly                                              | 5.9856E-3 |
| 7154  | cell communication                                                             | 6.1286E-3 |
| 70201 | regulation of establishment of protein localization                            | 6.3399E-3 |
| 737   | DNA catabolic process, endonucleolytic                                         | 6.3399E-3 |
| 70997 | neuron death                                                                   | 6.3399E-3 |
| 6309  | DNA fragmentation involved in apoptotic nuclear change                         | 6.3399E-3 |
| 51351 | positive regulation of ligase activity                                         | 6.4437E-3 |
| 10629 | negative regulation of gene expression                                         | 7.0016E-3 |
| 9267  | cellular response to starvation                                                | 7.2401E-3 |
| 6873  | cellular ion homeostasis                                                       | 7.5724E-3 |
| 30534 | adult behavior                                                                 | 7.6136E-3 |
| 51641 | cellular localization                                                          | 7.8168E-3 |
| 9987  | cellular process                                                               | 8.0794E-3 |
| 22403 | cell cycle phase                                                               | 8.2496E-3 |
| 30509 | BMP signaling pathway                                                          | 8.3094E-3 |
| 46928 | regulation of neurotransmitter secretion                                       | 8.3094E-3 |
| 43525 | positive regulation of neuron apoptosis                                        | 8.3094E-3 |
| 31397 | negative regulation of protein ubiquitination                                  | 8.3094E-3 |

|       |                                                                |           |
|-------|----------------------------------------------------------------|-----------|
| 55082 | cellular chemical homeostasis                                  | 8.3094E-3 |
| 32847 | regulation of cellular pH reduction                            | 8.4005E-3 |
| 71681 | cellular response to indole-3-methanol                         | 8.4005E-3 |
| 71680 | response to indole-3-methanol                                  | 8.4005E-3 |
| 2326  | B cell lineage commitment                                      | 8.4005E-3 |
| 2360  | T cell lineage commitment                                      | 8.4005E-3 |
| 10821 | regulation of mitochondrion organization                       | 8.4005E-3 |
| 7021  | tubulin complex assembly                                       | 8.4005E-3 |
| 48608 | reproductive structure development                             | 8.4101E-3 |
| 1541  | ovarian follicle development                                   | 8.6387E-3 |
| 42592 | homeostatic process                                            | 8.7978E-3 |
| 44093 | positive regulation of molecular function                      | 8.9894E-3 |
| 42127 | regulation of cell proliferation                               | 8.9894E-3 |
| 45913 | positive regulation of carbohydrate metabolic process          | 8.9894E-3 |
| 43154 | negative regulation of caspase activity                        | 8.9894E-3 |
| 10676 | positive regulation of cellular carbohydrate metabolic process | 8.9894E-3 |
| 31396 | regulation of protein ubiquitination                           | 9.1271E-3 |
| 51438 | regulation of ubiquitin-protein ligase activity                | 9.1271E-3 |
| 10565 | regulation of cellular ketone metabolic process                | 9.1271E-3 |
| 50953 | sensory perception of light stimulus                           | 9.3559E-3 |
| 7601  | visual perception                                              | 9.3559E-3 |
| 3012  | muscle system process                                          | 9.5278E-3 |
| 23034 | intracellular signaling pathway                                | 9.9988E-3 |
| 51224 | negative regulation of protein transport                       | 1.0380E-2 |
| 48729 | tissue morphogenesis                                           | 1.0422E-2 |
| 51340 | regulation of ligase activity                                  | 1.0465E-2 |
| 10740 | positive regulation of intracellular protein kinase cascade    | 1.0567E-2 |
| 9967  | positive regulation of signal transduction                     | 1.0567E-2 |
| 6511  | ubiquitin-dependent protein catabolic process                  | 1.0795E-2 |
| 8344  | adult locomotory behavior                                      | 1.0947E-2 |
| 43122 | regulation of I-kappaB kinase/NF-kappaB cascade                | 1.1056E-2 |
| 46889 | positive regulation of lipid biosynthetic process              | 1.1056E-2 |
| 48538 | thymus development                                             | 1.1056E-2 |
| 8634  | negative regulation of survival gene product expression        | 1.1225E-2 |
| 48739 | cardiac muscle fiber development                               | 1.1225E-2 |
| 32469 | endoplasmic reticulum calcium ion homeostasis                  | 1.1225E-2 |
| 8406  | gonad development                                              | 1.1317E-2 |
| 70887 | cellular response to chemical stimulus                         | 1.1601E-2 |
| 45786 | negative regulation of cell cycle                              | 1.1690E-2 |
| 43632 | modification-dependent macromolecule catabolic process         | 1.1690E-2 |
| 19941 | modification-dependent protein catabolic process               | 1.1690E-2 |
| 19538 | protein metabolic process                                      | 1.1995E-2 |
| 30262 | apoptotic nuclear change                                       | 1.2096E-2 |
| 19725 | cellular homeostasis                                           | 1.2322E-2 |
| 50801 | ion homeostasis                                                | 1.2989E-2 |
| 48754 | branching morphogenesis of a tube                              | 1.3229E-2 |
| 19216 | regulation of lipid metabolic process                          | 1.3268E-2 |
| 33077 | T cell differentiation in the thymus                           | 1.3268E-2 |

|       |                                                           |           |
|-------|-----------------------------------------------------------|-----------|
| 43255 | regulation of carbohydrate biosynthetic process           | 1.3268E-2 |
| 10595 | positive regulation of endothelial cell migration         | 1.3268E-2 |
| 51588 | regulation of neurotransmitter transport                  | 1.3268E-2 |
| 34599 | cellular response to oxidative stress                     | 1.3482E-2 |
| 7612  | learning                                                  | 1.4385E-2 |
| 45165 | cell fate commitment                                      | 1.4521E-2 |
| 85    | G2 phase of mitotic cell cycle                            | 1.4541E-2 |
| 51319 | G2 phase                                                  | 1.4541E-2 |
| 10332 | response to gamma radiation                               | 1.4590E-2 |
| 46890 | regulation of lipid biosynthetic process                  | 1.5117E-2 |
| 34621 | cellular macromolecular complex subunit organization      | 1.5532E-2 |
| 48285 | organelle fission                                         | 1.5728E-2 |
| 43161 | proteasomal ubiquitin-dependent protein catabolic process | 1.5728E-2 |
| 10498 | proteasomal protein catabolic process                     | 1.5728E-2 |
| 51969 | regulation of transmission of nerve impulse               | 1.5728E-2 |
| 31398 | positive regulation of protein ubiquitination             | 1.5763E-2 |
| 42594 | response to starvation                                    | 1.5763E-2 |
| 6921  | cellular component disassembly involved in apoptosis      | 1.5813E-2 |
| 31668 | cellular response to extracellular stimulus               | 1.6369E-2 |
| 51346 | negative regulation of hydrolase activity                 | 1.6642E-2 |
| 71496 | cellular response to external stimulus                    | 1.6962E-2 |
| 51384 | response to glucocorticoid stimulus                       | 1.6962E-2 |
| 48869 | cellular developmental process                            | 1.6993E-2 |
| 9409  | response to cold                                          | 1.7077E-2 |
| 1658  | branching involved in ureteric bud morphogenesis          | 1.7077E-2 |
| 10466 | negative regulation of peptidase activity                 | 1.7077E-2 |
| 60688 | regulation of morphogenesis of a branching structure      | 1.7077E-2 |
| 50808 | synapse organization                                      | 1.7156E-2 |
| 6919  | activation of caspase activity                            | 1.7156E-2 |
| 40014 | regulation of multicellular organism growth               | 1.7156E-2 |
| 10623 | developmental programmed cell death                       | 1.7646E-2 |
| 31109 | microtubule polymerization or depolymerization            | 1.7646E-2 |
| 43496 | regulation of protein homodimerization activity           | 1.7646E-2 |
| 60052 | neurofilament cytoskeleton organization                   | 1.7646E-2 |
| 44238 | primary metabolic process                                 | 1.7646E-2 |
| 48468 | cell development                                          | 1.8062E-2 |
| 7568  | aging                                                     | 1.8113E-2 |
| 48731 | system development                                        | 1.8226E-2 |
| 61138 | morphogenesis of a branching epithelium                   | 1.8352E-2 |
| 30003 | cellular cation homeostasis                               | 1.8505E-2 |
| 45137 | development of primary sexual characteristics             | 1.8505E-2 |
| 23051 | regulation of signaling process                           | 1.8505E-2 |
| 7275  | multicellular organismal development                      | 1.8558E-2 |
| 8584  | male gonad development                                    | 1.8558E-2 |
| 60675 | ureteric bud morphogenesis                                | 1.9728E-2 |
| 1666  | response to hypoxia                                       | 2.0108E-2 |
| 31644 | regulation of neurological system process                 | 2.0108E-2 |
| 48646 | anatomical structure formation involved in morphogenesis  | 2.0108E-2 |



|       |                                                          |           |
|-------|----------------------------------------------------------|-----------|
| 1894  | tissue homeostasis                                       | 2.0467E-2 |
| 32355 | response to estradiol stimulus                           | 2.0467E-2 |
| 6954  | inflammatory response                                    | 2.0467E-2 |
| 34622 | cellular macromolecular complex assembly                 | 2.0782E-2 |
| 51649 | establishment of localization in cell                    | 2.0782E-2 |
| 31960 | response to corticosteroid stimulus                      | 2.0790E-2 |
| 60    | protein import into nucleus, translocation               | 2.0879E-2 |
| 50772 | positive regulation of axonogenesis                      | 2.0879E-2 |
| 1782  | B cell homeostasis                                       | 2.0879E-2 |
| 1963  | synaptic transmission, dopaminergic                      | 2.0879E-2 |
| 6878  | cellular copper ion homeostasis                          | 2.0879E-2 |
| 6998  | nuclear envelope organization                            | 2.0879E-2 |
| 30154 | cell differentiation                                     | 2.0888E-2 |
| 48534 | hemopoietic or lymphoid organ development                | 2.1056E-2 |
| 60255 | regulation of macromolecule metabolic process            | 2.1667E-2 |
| 16044 | cellular membrane organization                           | 2.1888E-2 |
| 61024 | membrane organization                                    | 2.2235E-2 |
| 2009  | morphogenesis of an epithelium                           | 2.2270E-2 |
| 1776  | leukocyte homeostasis                                    | 2.2270E-2 |
| 6936  | muscle contraction                                       | 2.2270E-2 |
| 10627 | regulation of intracellular protein kinase cascade       | 2.2834E-2 |
| 10212 | response to ionizing radiation                           | 2.2834E-2 |
| 51651 | maintenance of location in cell                          | 2.2834E-2 |
| 40007 | growth                                                   | 2.3153E-2 |
| 9891  | positive regulation of biosynthetic process              | 2.3530E-2 |
| 8306  | associative learning                                     | 2.3840E-2 |
| 34637 | cellular carbohydrate biosynthetic process               | 2.3840E-2 |
| 70482 | response to oxygen levels                                | 2.4506E-2 |
| 32501 | multicellular organismal process                         | 2.4506E-2 |
| 70306 | lens fiber cell differentiation                          | 2.4506E-2 |
| 55070 | copper ion homeostasis                                   | 2.4506E-2 |
| 32026 | response to magnesium ion                                | 2.4506E-2 |
| 43280 | positive regulation of caspase activity                  | 2.4665E-2 |
| 10952 | positive regulation of peptidase activity                | 2.4665E-2 |
| 7416  | synapse assembly                                         | 2.5349E-2 |
| 48513 | organ development                                        | 2.7020E-2 |
| 46474 | glycerophospholipid biosynthetic process                 | 2.7020E-2 |
| 50769 | positive regulation of neurogenesis                      | 2.7020E-2 |
| 7611  | learning or memory                                       | 2.7020E-2 |
| 9790  | embryonic development                                    | 2.7020E-2 |
| 7569  | cell aging                                               | 2.7020E-2 |
| 48747 | muscle fiber development                                 | 2.7020E-2 |
| 2520  | immune system development                                | 2.7888E-2 |
| 60429 | epithelium development                                   | 2.8392E-2 |
| 43123 | positive regulation of I-kappaB kinase/NF-kappaB cascade | 2.8403E-2 |
| 45723 | positive regulation of fatty acid biosynthetic process   | 2.8403E-2 |
| 6107  | oxaloacetate metabolic process                           | 2.8403E-2 |
| 7080  | mitotic metaphase plate congression                      | 2.8403E-2 |

|       |                                                                 |           |
|-------|-----------------------------------------------------------------|-----------|
| 48070 | regulation of developmental pigmentation                        | 2.8403E-2 |
| 19222 | regulation of metabolic process                                 | 2.8403E-2 |
| 70    | mitotic sister chromatid segregation                            | 2.8585E-2 |
| 8585  | female gonad development                                        | 2.8850E-2 |
| 22602 | ovulation cycle process                                         | 3.0225E-2 |
| 46651 | lymphocyte proliferation                                        | 3.0654E-2 |
| 8152  | metabolic process                                               | 3.1887E-2 |
| 42110 | T cell activation                                               | 3.2161E-2 |
| 7167  | enzyme linked receptor protein signaling pathway                | 3.2517E-2 |
| 34614 | cellular response to reactive oxygen species                    | 3.2635E-2 |
| 6839  | mitochondrial transport                                         | 3.2635E-2 |
| 45736 | negative regulation of cyclin-dependent protein kinase activity | 3.2635E-2 |
| 42100 | B cell proliferation                                            | 3.2635E-2 |
| 7617  | mating behavior                                                 | 3.2635E-2 |
| 32225 | regulation of synaptic transmission, dopaminergic               | 3.2635E-2 |
| 55080 | cation homeostasis                                              | 3.2635E-2 |
| 51960 | regulation of nervous system development                        | 3.3361E-2 |
| 1763  | morphogenesis of a branching structure                          | 3.3472E-2 |
| 60627 | regulation of vesicle-mediated transport                        | 3.3472E-2 |
| 46546 | development of primary male sexual characteristics              | 3.3472E-2 |
| 31669 | cellular response to nutrient levels                            | 3.3472E-2 |
| 32943 | mononuclear cell proliferation                                  | 3.4146E-2 |
| 9966  | regulation of signal transduction                               | 3.4756E-2 |
| 23033 | signaling pathway                                               | 3.4767E-2 |
| 32989 | cellular component morphogenesis                                | 3.4821E-2 |
| 51241 | negative regulation of multicellular organismal process         | 3.4821E-2 |
| 7346  | regulation of mitotic cell cycle                                | 3.4821E-2 |
| 9617  | response to bacterium                                           | 3.5610E-2 |
| 7548  | sex differentiation                                             | 3.5610E-2 |
| 46545 | development of primary female sexual characteristics            | 3.5683E-2 |
| 90305 | nucleic acid phosphodiester bond hydrolysis                     | 3.5683E-2 |
| 45833 | negative regulation of lipid metabolic process                  | 3.5683E-2 |
| 70661 | leukocyte proliferation                                         | 3.5683E-2 |
| 280   | nuclear division                                                | 3.5719E-2 |
| 7067  | mitosis                                                         | 3.5719E-2 |
| 14059 | regulation of dopamine secretion                                | 3.5719E-2 |
| 51310 | metaphase plate congression                                     | 3.5719E-2 |
| 10559 | regulation of glycoprotein biosynthetic process                 | 3.5719E-2 |
| 43536 | positive regulation of blood vessel endothelial cell migration  | 3.5719E-2 |
| 6833  | water transport                                                 | 3.5719E-2 |
| 31571 | G1/S DNA damage checkpoint                                      | 3.5719E-2 |
| 60749 | mammary gland alveolus development                              | 3.5719E-2 |
| 8088  | axon cargo transport                                            | 3.5719E-2 |
| 32729 | positive regulation of interferon-gamma production              | 3.5719E-2 |
| 45321 | leukocyte activation                                            | 3.5719E-2 |
| 30097 | hemopoiesis                                                     | 3.5719E-2 |
| 33157 | regulation of intracellular protein transport                   | 3.5934E-2 |
| 31099 | regeneration                                                    | 3.5934E-2 |

|       |                                                        |           |
|-------|--------------------------------------------------------|-----------|
| 209   | protein polyubiquitination                             | 3.6744E-2 |
| 3006  | reproductive developmental process                     | 3.6744E-2 |
| 60562 | epithelial tube morphogenesis                          | 3.6744E-2 |
| 42698 | ovulation cycle                                        | 3.7120E-2 |
| 7369  | gastrulation                                           | 3.7120E-2 |
| 22008 | neurogenesis                                           | 3.7418E-2 |
| 2237  | response to molecule of bacterial origin               | 3.7531E-2 |
| 2521  | leukocyte differentiation                              | 3.7531E-2 |
| 10594 | regulation of endothelial cell migration               | 3.8592E-2 |
| 30335 | positive regulation of cell migration                  | 3.8592E-2 |
| 3013  | circulatory system process                             | 3.8829E-2 |
| 8015  | blood circulation                                      | 3.8829E-2 |
| 87    | M phase of mitotic cell cycle                          | 3.9248E-2 |
| 71310 | cellular response to organic substance                 | 3.9248E-2 |
| 50804 | regulation of synaptic transmission                    | 3.9248E-2 |
| 33138 | positive regulation of peptidyl-serine phosphorylation | 3.9248E-2 |
| 8625  | induction of apoptosis via death domain receptors      | 3.9248E-2 |
| 45773 | positive regulation of axon extension                  | 3.9248E-2 |
| 42044 | fluid transport                                        | 3.9248E-2 |
| 32330 | regulation of chondrocyte differentiation              | 3.9248E-2 |
| 10675 | regulation of cellular carbohydrate metabolic process  | 4.0076E-2 |
| 6066  | alcohol metabolic process                              | 4.0076E-2 |
| 31328 | positive regulation of cellular biosynthetic process   | 4.0076E-2 |
| 904   | cell morphogenesis involved in differentiation         | 4.0076E-2 |
| 46660 | female sex differentiation                             | 4.0076E-2 |
| 46661 | male sex differentiation                               | 4.0076E-2 |
| 7059  | chromosome segregation                                 | 4.0076E-2 |
| 45017 | glycerolipid biosynthetic process                      | 4.0076E-2 |
| 42391 | regulation of membrane potential                       | 4.1530E-2 |
| 30183 | B cell differentiation                                 | 4.1530E-2 |
| 50679 | positive regulation of epithelial cell proliferation   | 4.1530E-2 |
| 6109  | regulation of carbohydrate metabolic process           | 4.1530E-2 |
| 46649 | lymphocyte activation                                  | 4.1530E-2 |
| 51222 | positive regulation of protein transport               | 4.1530E-2 |
| 48871 | multicellular organismal homeostasis                   | 4.1530E-2 |
| 43434 | response to peptide hormone stimulus                   | 4.1530E-2 |
| 9651  | response to salt stress                                | 4.1530E-2 |
| 14048 | regulation of glutamate secretion                      | 4.1530E-2 |
| 10165 | response to X-ray                                      | 4.1530E-2 |
| 51354 | negative regulation of oxidoreductase activity         | 4.1530E-2 |
| 22414 | reproductive process                                   | 4.1530E-2 |
| 48609 | reproductive process in a multicellular organism       | 4.1530E-2 |
| 32504 | multicellular organism reproduction                    | 4.1530E-2 |
| 51235 | maintenance of location                                | 4.1530E-2 |
| 50877 | neurological system process                            | 4.1530E-2 |
| 16567 | protein ubiquitination                                 | 4.1530E-2 |
| 51336 | regulation of hydrolase activity                       | 4.1530E-2 |
| 3     | reproduction                                           | 4.1530E-2 |

|       |                                                                                                    |           |
|-------|----------------------------------------------------------------------------------------------------|-----------|
| 7267  | cell-cell signaling                                                                                | 4.1530E-2 |
| 6259  | DNA metabolic process                                                                              | 4.1530E-2 |
| 51272 | positive regulation of cellular component movement                                                 | 4.1530E-2 |
| 40017 | positive regulation of locomotion                                                                  | 4.1530E-2 |
| 32848 | negative regulation of cellular pH reduction                                                       | 4.1530E-2 |
| 90200 | positive regulation of release of cytochrome c from mitochondria                                   | 4.1530E-2 |
| 32976 | release of matrix enzymes from mitochondria                                                        | 4.1530E-2 |
| 70495 | negative regulation of thrombin receptor signaling pathway                                         | 4.1530E-2 |
| 70494 | regulation of thrombin receptor signaling pathway                                                  | 4.1530E-2 |
| 33693 | neurofilament bundle assembly                                                                      | 4.1530E-2 |
| 21747 | cochlear nucleus development                                                                       | 4.1530E-2 |
| 46370 | fructose biosynthetic process                                                                      | 4.1530E-2 |
| 50747 | positive regulation of lipoprotein metabolic process                                               | 4.1530E-2 |
| 46674 | induction of retinal programmed cell death                                                         | 4.1530E-2 |
| 50812 | regulation of acyl-CoA biosynthetic process                                                        | 4.1530E-2 |
| 1711  | endodermal cell fate commitment                                                                    | 4.1530E-2 |
| 14041 | regulation of neuron maturation                                                                    | 4.1530E-2 |
| 14042 | positive regulation of neuron maturation                                                           | 4.1530E-2 |
| 6060  | sorbitol metabolic process                                                                         | 4.1530E-2 |
| 6062  | sorbitol catabolic process                                                                         | 4.1530E-2 |
| 51124 | synaptic growth at neuromuscular junction                                                          | 4.1530E-2 |
| 51160 | L-xylitol catabolic process                                                                        | 4.1530E-2 |
| 51164 | L-xylitol metabolic process                                                                        | 4.1530E-2 |
| 42999 | regulation of Golgi to plasma membrane CFTR protein transport                                      | 4.1530E-2 |
| 43002 | negative regulation of Golgi to plasma membrane CFTR protein transport                             | 4.1530E-2 |
| 43004 | cytoplasmic sequestering of CFTR protein                                                           | 4.1530E-2 |
| 51315 | attachment of spindle microtubules to kinetochore involved in mitotic sister chromatid segregation | 4.1530E-2 |
| 43217 | myelin maintenance                                                                                 | 4.1530E-2 |
| 43369 | CD4-positive or CD8-positive, alpha-beta T cell lineage commitment                                 | 4.1530E-2 |
| 43375 | CD8-positive, alpha-beta T cell lineage commitment                                                 | 4.1530E-2 |
| 51581 | negative regulation of neurotransmitter uptake                                                     | 4.1530E-2 |
| 51585 | negative regulation of dopamine uptake                                                             | 4.1530E-2 |
| 51611 | regulation of serotonin uptake                                                                     | 4.1530E-2 |
| 51612 | negative regulation of serotonin uptake                                                            | 4.1530E-2 |
| 51621 | regulation of norepinephrine uptake                                                                | 4.1530E-2 |
| 51622 | negative regulation of norepinephrine uptake                                                       | 4.1530E-2 |
| 2477  | antigen processing and presentation of exogenous peptide antigen via MHC class Ib                  | 4.1530E-2 |
| 2481  | antigen processing and presentation of exogenous protein antigen via MHC class Ib, TAP-dependent   | 4.1530E-2 |
| 2525  | acute inflammatory response to non-antigenic stimulus                                              | 4.1530E-2 |
| 2575  | basophil chemotaxis                                                                                | 4.1530E-2 |
| 14916 | regulation of lung blood pressure                                                                  | 4.1530E-2 |
| 10822 | positive regulation of mitochondrion organization                                                  | 4.1530E-2 |
| 6808  | regulation of nitrogen utilization                                                                 | 4.1530E-2 |
| 51913 | regulation of synaptic plasticity by chemical substance                                            | 4.1530E-2 |
| 51914 | positive regulation of synaptic plasticity by chemical substance                                   | 4.1530E-2 |

|       |                                                                                        |           |
|-------|----------------------------------------------------------------------------------------|-----------|
| 51915 | induction of synaptic plasticity by chemical substance                                 | 4.1530E-2 |
| 51945 | negative regulation of catecholamine uptake involved in synaptic transmission          | 4.1530E-2 |
| 60215 | primitive hemopoiesis                                                                  | 4.1530E-2 |
| 60266 | negative regulation of respiratory burst involved in inflammatory response             | 4.1530E-2 |
| 60268 | negative regulation of respiratory burst                                               | 4.1530E-2 |
| 60319 | primitive erythrocyte differentiation                                                  | 4.1530E-2 |
| 19407 | hexitol catabolic process                                                              | 4.1530E-2 |
| 19519 | pentitol metabolic process                                                             | 4.1530E-2 |
| 19527 | pentitol catabolic process                                                             | 4.1530E-2 |
| 31987 | locomotion involved in locomotory behavior                                             | 4.1530E-2 |
| 60697 | positive regulation of phospholipid catabolic process                                  | 4.1530E-2 |
| 48668 | collateral sprouting                                                                   | 4.1530E-2 |
| 48669 | collateral sprouting in the absence of injury                                          | 4.1530E-2 |
| 32287 | myelin maintenance in the peripheral nervous system                                    | 4.1530E-2 |
| 48743 | positive regulation of skeletal muscle fiber development                               | 4.1530E-2 |
| 32621 | interleukin-18 production                                                              | 4.1530E-2 |
| 16238 | chaperone-mediated autophagy                                                           | 4.1530E-2 |
| 46907 | intracellular transport                                                                | 4.1908E-2 |
| 44262 | cellular carbohydrate metabolic process                                                | 4.2121E-2 |
| 16486 | peptide hormone processing                                                             | 4.2148E-2 |
| 19098 | reproductive behavior                                                                  | 4.2148E-2 |
| 60395 | SMAD protein signal transduction                                                       | 4.2148E-2 |
| 48732 | gland development                                                                      | 4.2359E-2 |
| 55002 | striated muscle cell development                                                       | 4.4786E-2 |
| 9615  | response to virus                                                                      | 4.5859E-2 |
| 10638 | positive regulation of organelle organization                                          | 4.5859E-2 |
| 50000 | chromosome localization                                                                | 4.6700E-2 |
| 30104 | water homeostasis                                                                      | 4.6700E-2 |
| 51303 | establishment of chromosome localization                                               | 4.6700E-2 |
| 10862 | positive regulation of pathway-restricted SMAD protein phosphorylation                 | 4.6700E-2 |
| 61035 | regulation of cartilage development                                                    | 4.6700E-2 |
| 45944 | positive regulation of transcription from RNA polymerase II promoter                   | 4.6710E-2 |
| 10769 | regulation of cell morphogenesis involved in differentiation                           | 4.6914E-2 |
| 90092 | regulation of transmembrane receptor protein serine/threonine kinase signaling pathway | 4.6914E-2 |
| 48593 | camera-type eye morphogenesis                                                          | 4.8988E-2 |
| 48638 | regulation of developmental growth                                                     | 4.8988E-2 |
| 1817  | regulation of cytokine production                                                      | 4.9769E-2 |
| 48666 | neuron development                                                                     | 4.9918E-2 |

All biological processes. Significance level  $p < 0.05$ .
